# Supplementary material for: The Role of Cerium Valence in the Conversion Temperature of H2Ti3O7 Nanoribbons to TiO2-B and Anatase Nanoribbons, and Further to Rutile
Source: MDPI journal article supplement (doi:10.3390/molecules28155838), 2023-08-03
Supplement: s1 [file s1]

## The Role of Cerium Valence on the Conversion Temperature of $\text{H}_2\text{Ti}_3\text{O}_7$ Nanoribbons to $\text{TiO}_2$ -B and Anatase Nanoribbons, and Further to Rutile

Polona Umek <sup>1,\*</sup>, Michael Dürrschnabel <sup>2</sup>, Leopoldo Molina-Luna <sup>3</sup>, Srečo Škapin <sup>1</sup>, Romana Cerc <sup>1</sup>, and Carla Bittencourt <sup>5,\*</sup>

<sup>1</sup> Jožef Stefan Institute, Jamova cesta 39, 1000 Ljubljana, Slovenia; [polona.umek@ijs.si](mailto:polona.umek@ijs.si), [sreco.skapin@ijs.si](mailto:sreco.skapin@ijs.si)

<sup>2</sup> Karlsruhe Institute of Technology, P.O. Box 6980, 706049 Karlsruhe, Germany; [michael.duerrschnabel@kit.edu](mailto:michael.duerrschnabel@kit.edu)

<sup>3</sup> Technische Universität Darmstadt, Peter-Grünberg-Strasse 2, 64287 Darmstadt, Germany; [molina@aem.tu-darmstadt.de](mailto:molina@aem.tu-darmstadt.de)

<sup>4</sup> Faculty of Chemistry and Chemical Technology, University of Ljubljana, Večna pot 113, 1000 Ljubljana, Slovenia; [romana.cerc-korosec@fkkt.uni-lj.si](mailto:romana.cerc-korosec@fkkt.uni-lj.si)

<sup>5</sup> Chimie des Interactions Plasma-Surface (ChIPS), Research Institute for Materials Science and Engineering, University of Mons, 7000 Mons, Belgium; [carla.bittencourt@umons.ac.be](mailto:carla.bittencourt@umons.ac.be)

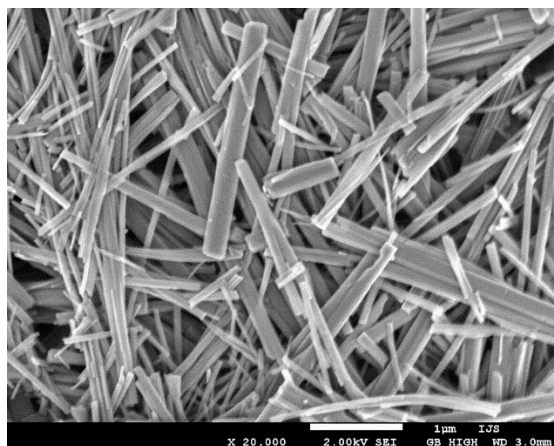

**Figure S1.** SEM image of  $\text{H}_2\text{Ti}_3\text{O}_7$  nanoribbons (HTiNRs) used as a precursor for wet impregnation/intercalation with  $\text{Ce}^{4+}$  and  $\text{Ce}^{3+}$ . The width of the nanoribbons (NRs) ranges from 20 to 350 nm, the majority of the NRs have lengths between 1 and 2  $\mu\text{m}$ , although separate NRs in length can reach up to 6  $\mu\text{m}$ .

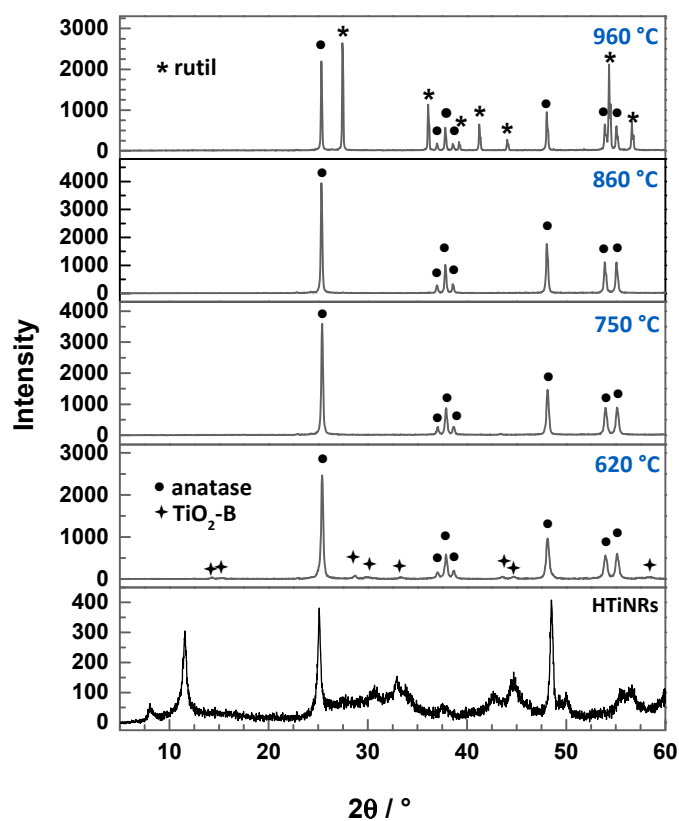

**Figure S2.** XRD of pristine HTiNRs and products calcined at 620, 750, 860, and 960 °C in air.

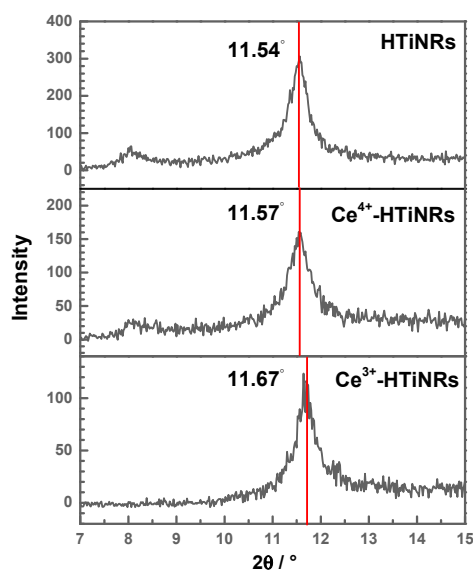

**Figure S3.** XRD patterns of HTiNRs (top),  $\text{Ce}^{4+}$ -HTiNRs (middle), and  $\text{Ce}^{3+}$ -HTiNRs (bottom) between 7 and 15°. Vertical lines guide the eye to easily observe the (100) peak shift to higher angles for  $\text{Ce}^{3+}$ -HTiNRs.

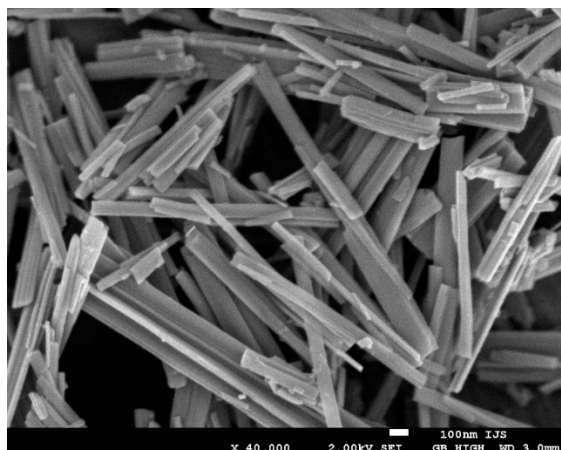

**Figure S4.** SEM image of HTiNRs impregnated with  $\text{Ce}^{4+}$  ( $\text{Ce}^{4+}$ -HTiNRs).

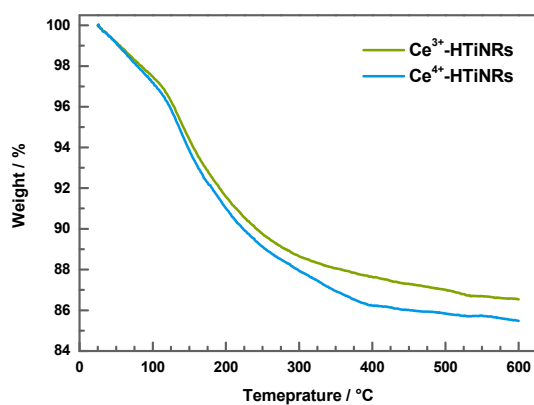

**Figure S5.** TGA curves for HTiNRs impregnated with  $\text{Ce}^{4+}$  ( $\text{Ce}^{4+}$ -HTiNRs) and  $\text{Ce}^{3+}$  ( $\text{Ce}^{3+}$ -HTiNRs) measured in air.

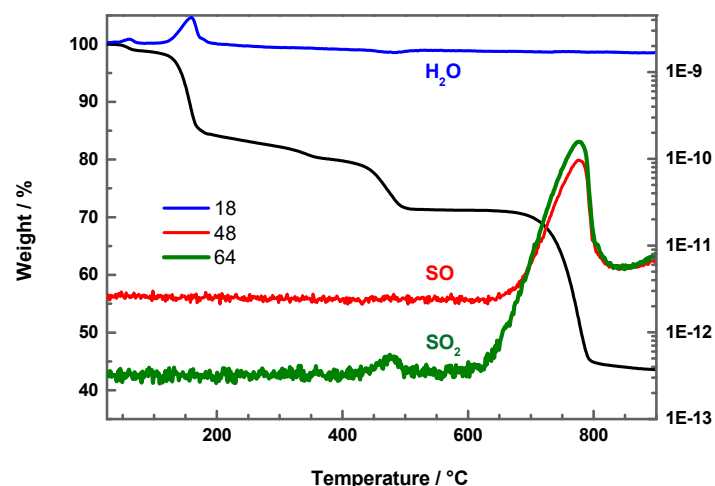

**Figure S6.** TGA curve of  $\text{Ce}(\text{SO}_4)_2 \cdot 4\text{H}_2\text{O}$  measured in air and MS of  $\text{H}_2\text{O}$ ,  $\text{SO}$ , and  $\text{SO}_2$ . Dehydration of crystalline bonded water takes place in one step and is finished at 200 °C. The decomposition of the sulfate group takes place in two steps. The first step starts at about 430 °C, on further heating the second step starts at about 600 °C. Decomposition of the sulfate group is completed above 800 °C, the final product formed is  $\text{CeO}_2$  and represents 43.6 wt. % of the starting mass. The theoretical mass loss for  $\text{Ce}(\text{SO}_4)_2 \cdot 2\text{H}_2\text{O}$  is 57.6 wt. % and agrees well with the observed one [65].

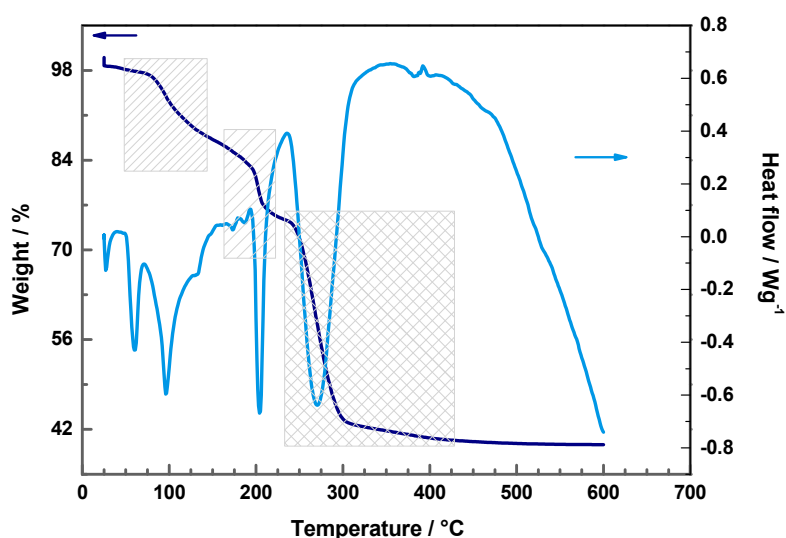

**Figure S7.** TGA and DSC curves of  $\text{Ce}(\text{NO}_3)_3 \cdot 6\text{H}_2\text{O}$  measured in air. Complete dehydration of crystalline water in  $\text{Ce}_2(\text{NO}_3)_3 \cdot 6\text{H}_2\text{O}$  is finished up to 210 °C, on further heating in the range 230 to 310 °C, decomposition of  $\text{Ce}_2(\text{NO}_3)_3$  takes place accompanied by oxidation of  $\text{Ce}^{3+}$  to  $\text{Ce}^{4+}$  resulting in the formation of  $\text{CeO}_2$  (39,6 wt. % of the starting mass). Theoretical mass loss for  $\text{Ce}_2(\text{NO}_3)_3 \cdot 6\text{H}_2\text{O}$  is 60.4 wt. % and agrees well with the observed one [66]

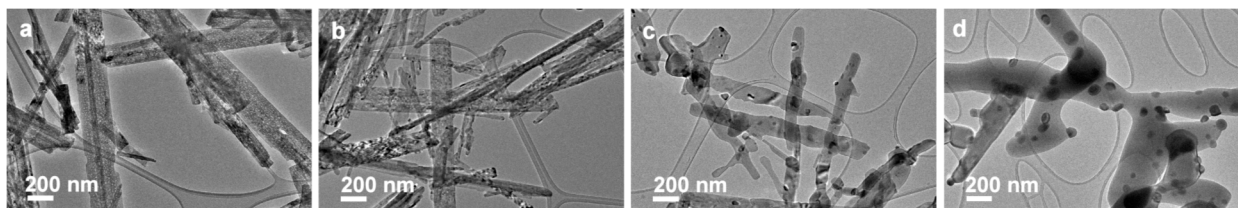

**Figure S8.** Breakdown of the nanoribbon morphology with increasing calcination temperature for  $\text{Ce}^{4+}$ -HTiNRs calcined at **a** 620 °C, **b** 750 °C, **c** 860 °C and **d** 960 °C. TEM images were taken at the same magnification.

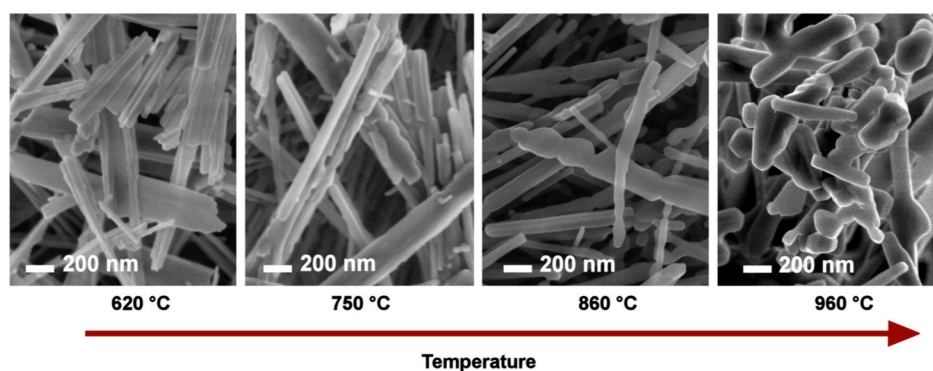

**Figure S9.** Collapse of the nanoribbon morphology with increasing calcination temperature for HTiNRs calcined at 620 °C, 750 °C, 860 °C, and 960 °C. SEM images were taken at the same magnification with a secondary electron detector.

**Figure S10.**  $\text{CeO}_2$  NPs size distribution for  $\text{Ce}^{4+}$ -860 °C and  $\text{Ce}^{4+}$ -960 °C.

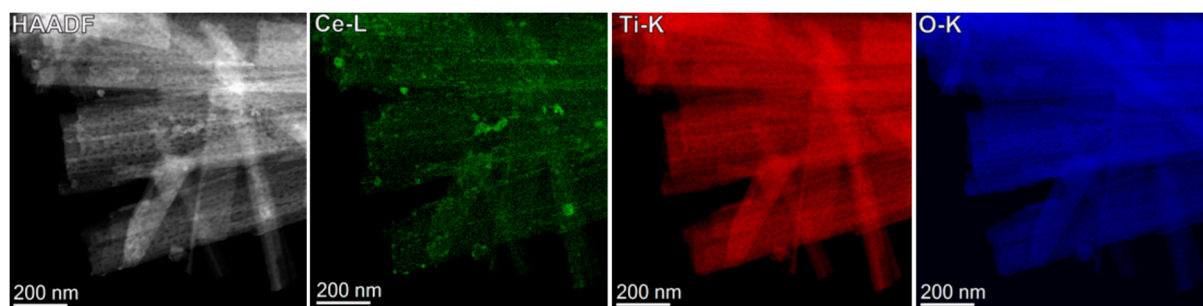

**Figure S11.** STEM-EDX elemental mapping of  $\text{Ce}^{4+}$ -620 °C.
